# Supplementary material for: Improved Characterisation of Vegetation and Land Surface Seasonal Dynamics in Central Japan with Himawari-8 Hypertemporal Data
Source: PubMed Central journal article supplement (PMC6821777; doi:10.1038/s41598-019-52076-x), 2019-10-30

**Supplementary Information for:**

Improved Characterisation of Vegetation and Land Surface Seasonal Dynamics in Central Japan with Himawari-8 Hypertemporal Data

Tomoaki Miura\*, Shin Nagai, Mika Takeuchi, Kazuhito Ichii, and Hiroki Yoshioka

Supplementary Table S1. Comparison of Select Characteristics of New-generation Geostationary Satellite Sensors

| Sensor                             | SEVIRI      |   | ABI                           |    | AGRI          |    | AMI            |    | AHI           |    | FCI              |    |
|------------------------------------|-------------|---|-------------------------------|----|---------------|----|----------------|----|---------------|----|------------------|----|
| Platform                           | MSG         |   | GOES-16/-17                   |    | FY-4A         |    | Geo-KOMPSAT-2A |    | Himawari-8/-9 |    | MTG-I            |    |
| Satellite Position                 | 3.4° W      |   | 75.2° W (16)<br>137.2° W (17) |    | 105° E        |    | 128.2° E       |    | 140.7° E      |    | To be determined |    |
| Band Center (μm) & Resolution (km) | -           | - | .470                          | 1  | .470          | 1  | .470           | 1  | .470          | 1  | .444             | 1  |
|                                    | -           | - | -                             | -  | -             | -  | .509           | 1  | .510          | 1  | .510             | 1  |
|                                    | .635        | 3 | .640                          | .5 | .650          | .5 | .640           | .5 | .640          | .5 | .640             | .5 |
|                                    | .810        | 3 | .865                          | 1  | .825          | 1  | .865           | 1  | .857          | 1  | .865             | 1  |
| Temporal Resolution (Full Disk)    | 15 min      |   | 15 min                        |    | 15 min        |    | 10 min         |    | 10 min        |    | 10 min           |    |
| First Launch Date                  | August 2002 |   | November 2016                 |    | December 2016 |    | December 2018  |    | October 2014  |    | Launch in 2021   |    |

Supplementary Table S2. Phenological Transition Dates (DOYs) Estimated from *In Situ* Time-lapse Digital Images

| <b>Site</b>           | <b>Phenological Events</b> | <b>2016</b> | <b>2017</b> | <b>Mean</b> |
|-----------------------|----------------------------|-------------|-------------|-------------|
| Takayama<br>(TKY)     | Start of Leaf Expansion    | 125         | 131         | 128         |
|                       | End of Leaf Expansion      | 150         | 153         | 151.5       |
|                       | Start of Leaf Fall         | 280         | 272         | 276         |
|                       | End of Leaf Fall           | 325         | 319         | 322         |
| Fujihokuroku<br>(FHK) | Start of Leaf Expansion    | 105         | 108         | 106.5       |
|                       | End of Leaf Expansion      | 136         | 140         | 138         |
|                       | Start of Leaf Fall         | 280         | 283         | 281.5       |
|                       | End of Leaf Fall           | 329         | 334         | 331.5       |

Supplementary Table S3. Comparison of Number of Days with Cloud-free Observations between AHI and VIIRS. The percent values were obtained by dividing the number of days with cloud-free observations by the number of days with PEN sky images, whereas the frequency values were calculated by dividing the latter by the former.

(a) Takayama (TKY) for Year 2016

| Period          | Range (DOY) | Total No. of Days | No. of Days with PEN |       | No. of Days with Cloud-free Obs. |       | Percentage (%) |       | Frequency |       |
|-----------------|-------------|-------------------|----------------------|-------|----------------------------------|-------|----------------|-------|-----------|-------|
|                 |             |                   | AHI                  | VIIRS | AHI                              | VIIRS | AHI            | VIIRS | AHI       | VIIRS |
| Pre-green-up    | 1-124       | 124               | 124                  | 124   | 35                               | 19    | 28             | 15    | 3.5       | 6.5   |
| Green-up        | 125-150     | 26                | 26                   | 26    | 7                                | 4     | 27             | 15    | 3.7       | 6.5   |
| Peak            | 151-279     | 129               | 129                  | 129   | 14                               | 5     | 11             | 3.9   | 9.2       | 26    |
| Brown-down      | 280-325     | 46                | 45                   | 45    | 15                               | 11    | 33             | 24    | 3.0       | 4.1   |
| Post-brown-down | 326-366     | 41                | 41                   | 41    | 8                                | 8     | 20             | 20    | 5.1       | 5.1   |

(b) TKY for Year 2017

| Period          | Range (DOY) | Total No. of Days | No. of Days with PEN |       | No. of Days with Cloud-free Obs. |       | Percentage (%) |       | Frequency |       |
|-----------------|-------------|-------------------|----------------------|-------|----------------------------------|-------|----------------|-------|-----------|-------|
|                 |             |                   | AHI                  | VIIRS | AHI                              | VIIRS | AHI            | VIIRS | AHI       | VIIRS |
| Pre-green-up    | 1-130       | 130               | 130                  | 130   | 27                               | 15    | 21             | 12    | 4.8       | 8.7   |
| Green-up        | 131-153     | 23                | 23                   | 23    | 6                                | 4     | 26             | 17    | 3.8       | 5.8   |
| Peak            | 154-271     | 118               | 118                  | 118   | 15                               | 10    | 13             | 8.5   | 7.9       | 12    |
| Brown-down      | 272-319     | 48                | 48                   | 48    | 15                               | 9     | 31             | 19    | 3.2       | 5.3   |
| Post-brown-down | 320-365     | 46                | 46                   | 46    | 9                                | 7     | 20             | 15    | 5.1       | 6.6   |

(c) Fujihokuroku (FHK) for Year 2016

| Period          | Range (DOY) | Total No. of Days | No. of Days with PEN |       | No. of Days with Cloud-free Obs. |       | Percentage (%) |       | Frequency |       |
|-----------------|-------------|-------------------|----------------------|-------|----------------------------------|-------|----------------|-------|-----------|-------|
|                 |             |                   | AHI                  | VIIRS | AHI                              | VIIRS | AHI            | VIIRS | AHI       | VIIRS |
| Pre-green-up    | 1-104       | 104               | 100                  | 99    | 36                               | 18    | 36             | 18    | 2.8       | 5.5   |
| Green-up        | 105-136     | 32                | 32                   | 32    | 6                                | 4     | 19             | 13    | 5.3       | 8.0   |
| Peak            | 137-279     | 143               | 141                  | 141   | 6                                | 1     | 4.3            | .71   | 24        | 141   |
| Brown-down      | 280-329     | 50                | 49                   | 49    | 13                               | 10    | 27             | 20    | 3.8       | 4.9   |
| Post-brown-down | 330-366     | 37                | 35                   | 34    | 21                               | 14    | 60             | 41    | 1.7       | 5.5   |

(Supplementary Table S3 – continued)

(d) FHK for Year 2017

| Period          | Range (DOY) | Total No. of Days | No. of Days with PEN |       | No. of Days with Cloud-free Obs. |       | Percentage (%) |       | Frequency |       |
|-----------------|-------------|-------------------|----------------------|-------|----------------------------------|-------|----------------|-------|-----------|-------|
|                 |             |                   | AHI                  | VIIRS | AHI                              | VIIRS | AHI            | VIIRS | AHI       | VIIRS |
| Pre-green-up    | 1-107       | 107               | 107                  | 107   | 44                               | 25    | 41             | 23    | 2.4       | 4.3   |
| Green-up        | 108-140     | 33                | 33                   | 33    | 5                                | 3     | 15             | 9.1   | 6.6       | 11    |
| Peak            | 141-282     | 142               | 142                  | 142   | 3                                | 2     | 2.1            | 1.4   | 47        | 71    |
| Brown-down      | 283-334     | 52                | 52                   | 52    | 22                               | 12    | 42             | 23    | 2.4       | 4.3   |
| Post-brown-down | 335-365     | 31                | 30                   | 29    | 23                               | 16    | 77             | 55    | 1.3       | 1.8   |

(e) Terrestrial Environment Research Center of University of Tsukuba (TGF) for Year 2016

| Period          | Range (DOY) | Total No. of Days | No. of Days with PEN |       | No. of Days with Cloud-free Obs. |       | Percentage (%) |       | Frequency |       |
|-----------------|-------------|-------------------|----------------------|-------|----------------------------------|-------|----------------|-------|-----------|-------|
|                 |             |                   | AHI                  | VIIRS | AHI                              | VIIRS | AHI            | VIIRS | AHI       | VIIRS |
| Pre-green-up    | 1- 90       | 90                | 90                   | 90    | 47                               | 37    | 52             | 41    | 1.9       | 2.4   |
| Green-up        | 91-135      | 45                | 45                   | 45    | 11                               | 5     | 24             | 11    | 4.1       | 9.0   |
| Peak            | 136-240     | 105               | 102                  | 101   | 14                               | 3     | 14             | 3.0   | 7.3       | 34    |
| Brown-down      | 241-330     | 90                | 76                   | 75    | 23                               | 17    | 30             | 23    | 3.3       | 4.4   |
| Post-brown-down | 331-366     | 36                | 36                   | 36    | 24                               | 16    | 67             | 44    | 1.5       | 2.3   |

(f) TGF for Year 2017

| Period          | Range (DOY) | Total No. of Days | No. of Days with PEN |       | No. of Days with Cloud-free Obs. |       | Percentage (%) |       | Frequency |       |
|-----------------|-------------|-------------------|----------------------|-------|----------------------------------|-------|----------------|-------|-----------|-------|
|                 |             |                   | AHI                  | VIIRS | AHI                              | VIIRS | AHI            | VIIRS | AHI       | VIIRS |
| Pre-green-up    | 1- 90       | 90                | 90                   | 89    | 53                               | 32    | 59             | 36    | 1.7       | 2.8   |
| Green-up        | 91-135      | 45                | 42                   | 41    | 9                                | 6     | 21             | 15    | 4.7       | 6.8   |
| Peak            | 136-240     | 105               | 104                  | 104   | 7                                | 2     | 6.7            | 1.9   | 15        | 52    |
| Brown-down      | 241-330     | 90                | 90                   | 90    | 25                               | 18    | 28             | 20    | 3.6       | 5.0   |
| Post-brown-down | 331-365     | 35                | 34                   | 34    | 25                               | 21    | 74             | 62    | 1.4       | 1.6   |

Supplementary Figure S1. Locations of three study sites, Takayama (TKY), Fujihokuroku (FHK), and Terrestrial Environment Research Center of University of Tsukuba (TGF), superimposed on Himawari AHI NDVI image. This NDVI image was generated by temporally compositing all AHI NDVI images acquired in the month of July 2016 with the maximum-value compositing method. The coastline vector dataset was obtained from the Geospatial Information Authority of Japan ([http://www.gsi.go.jp/kankyochiri/gm\\_japan\\_e.html](http://www.gsi.go.jp/kankyochiri/gm_japan_e.html)). The map was created with ArcGIS® software (ArcMap™ 10.6.1, Esri, Redlands, California, USA, <http://www.esri.com>).

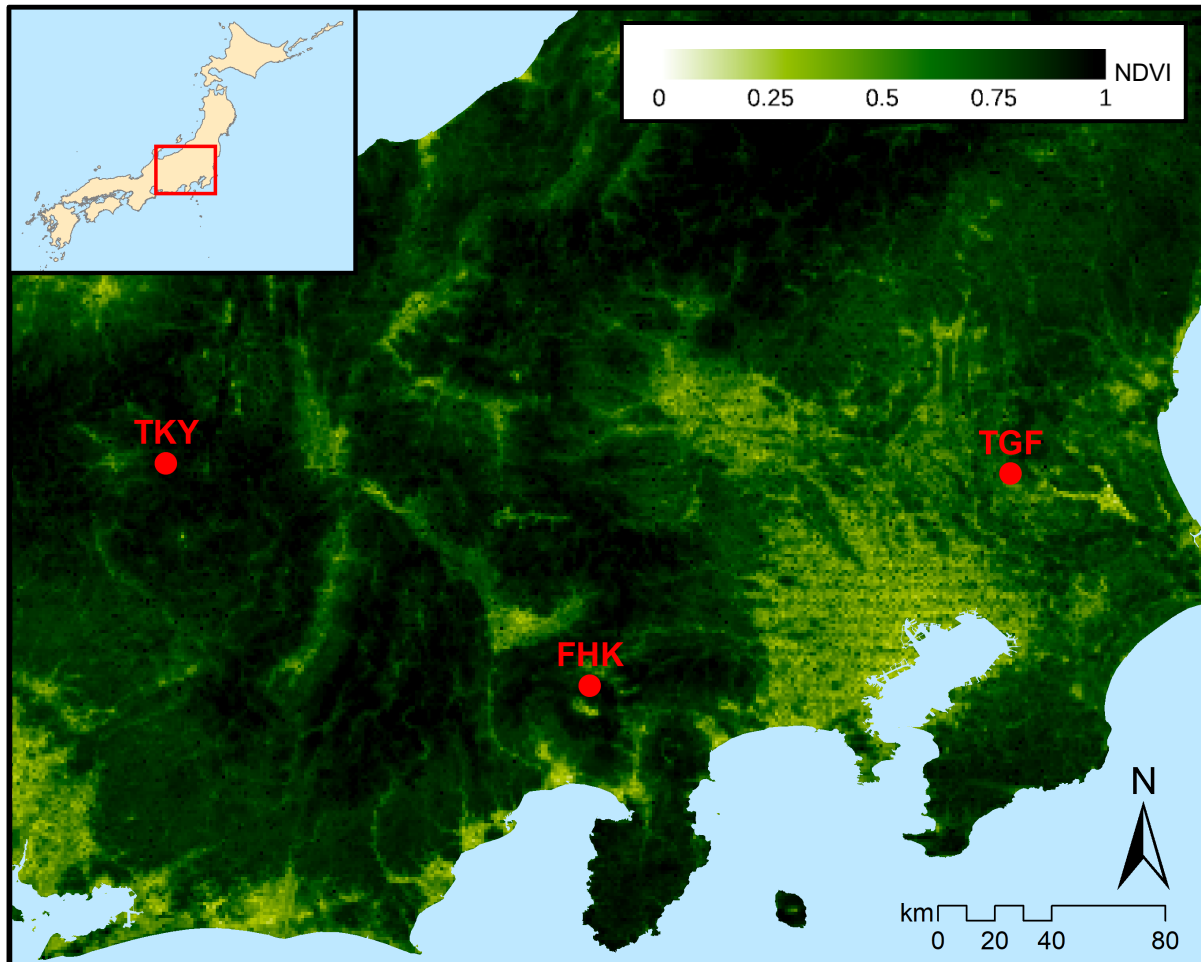

Supplementary Figure S2. AHI NDVI temporal profile (middle) compared to the VIIRS counterpart (bottom) for the Takayama (TKY) site for the year 2017. Sample PEN *in situ* images representing five phenological stages are shown at the top. The numbers on the PEN images are the year (lower-left) and DOY (lower-right) of the corresponding image acquisition. The vertical dashed lines are phenological transition dates identified with PEN time-lapse images (see Supplementary Table S2 online). Low NDVI values indicated by “SG1” were associated with persistent cloud cover during the baiu season followed by the passage of Typhoon-3 and those indicated by “SG2” were due to thick cloud cover followed by the passage of Typhoon-21.

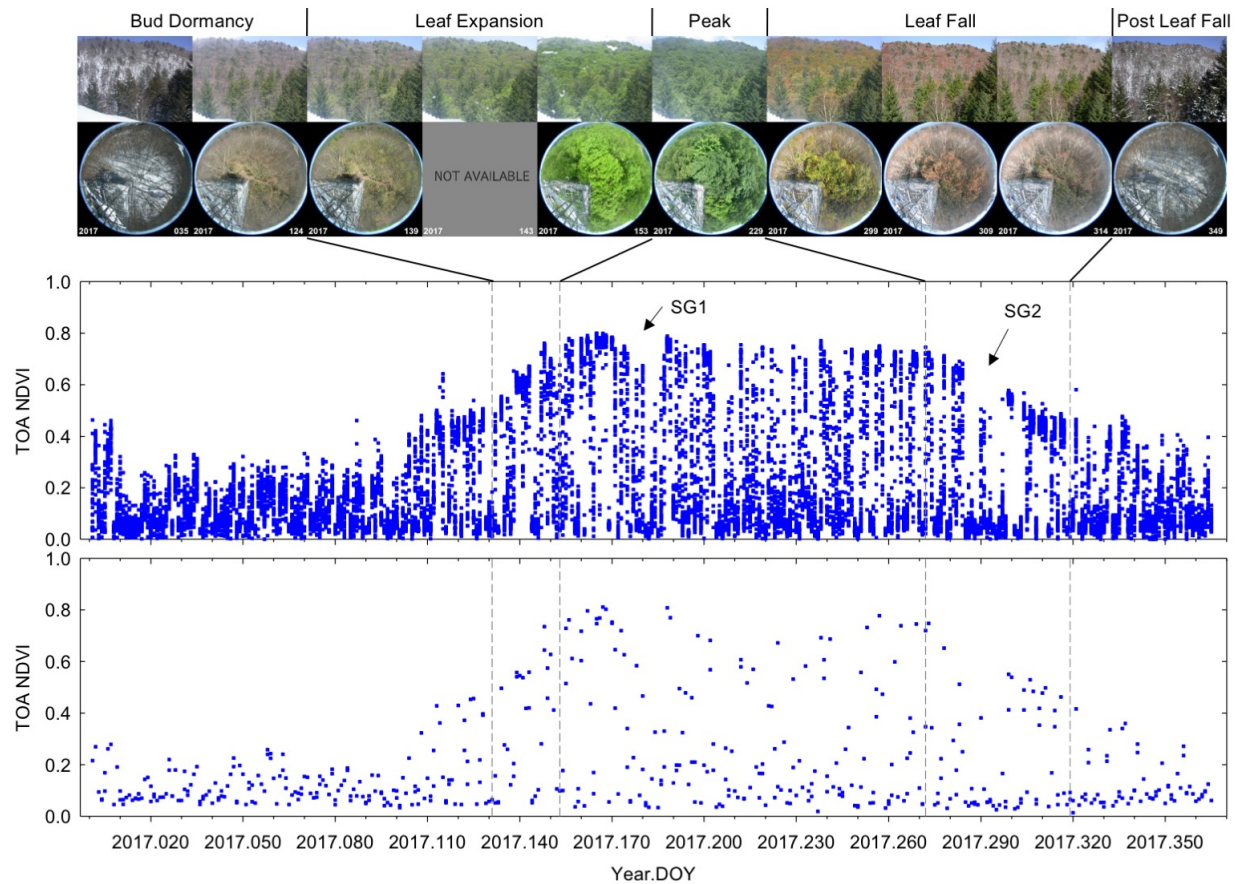

Supplementary Figure S3. AHI NDVI seasonal changes (middle) during the first five months of the year 2017 for the Fujihokuroku (FHK) site. Plotted at the bottom is the VIIRS counterpart for comparison. Representative PEN *in situ* images for every distinctive snow cover condition are shown at the top. The numbers on the PEN images are the year (lower-left) and DOY (lower-right) of the corresponding image acquisition. The AHI NDVI was continuously higher during a period indicated by “SC1” than during nearby pre- and post-SC1 periods, which was not clearly visible in the VIIRS NDVI. PEN images showed receded snow cover for the SC1 period.

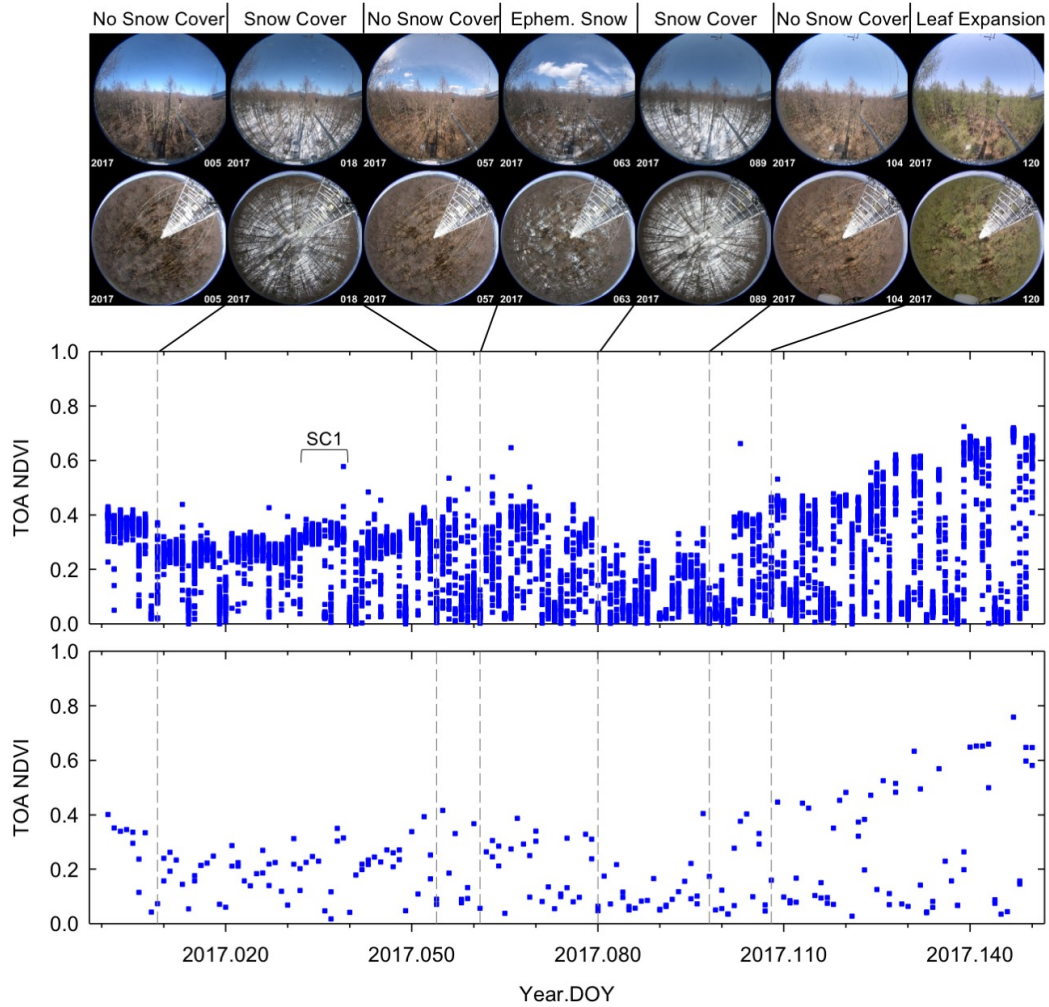

Supplementary Figure S4. VIIRS and AHI NDVI data over spring green-up and fall brown-down periods for the Takayama (TKY) site for the year 2017: (a) VIIRS and (b) AHI for the green-up season, and (c) VIIRS and (d) AHI for the brown-down period.

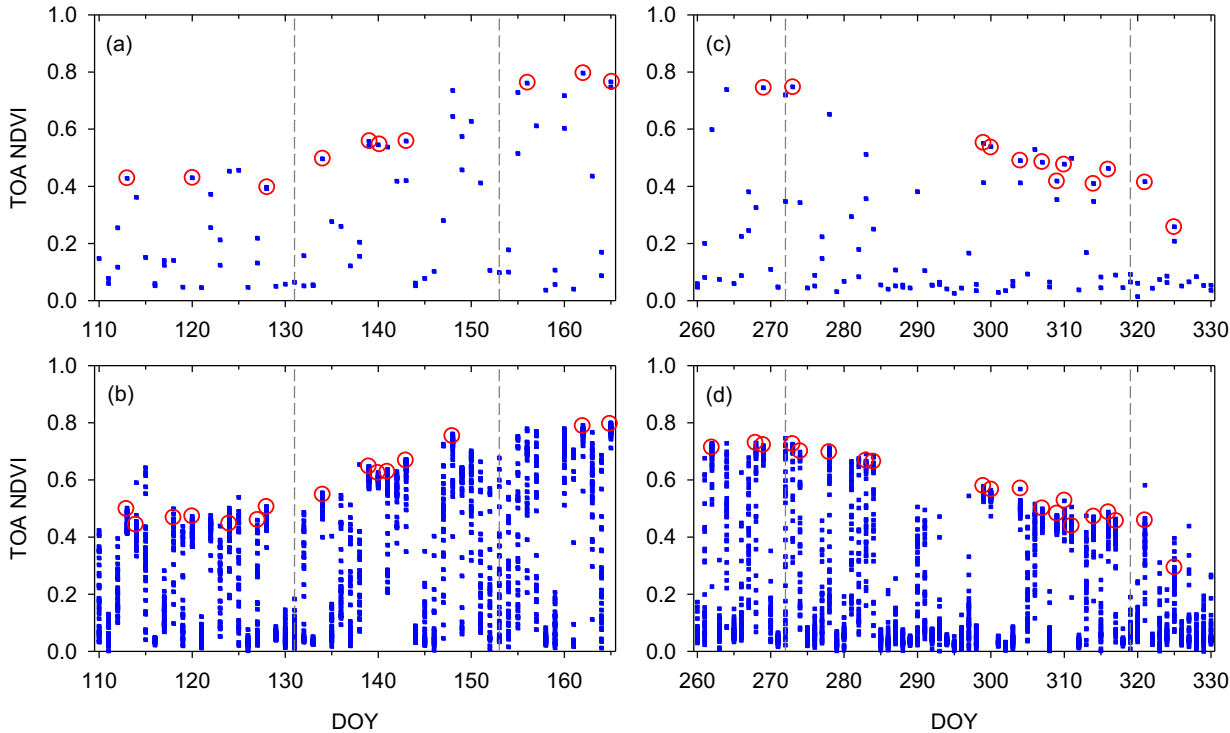



Supplementary Figure S5. Same as Supplementary Fig. S4, but for the Fujihokuroku (FHK) site for the year 2016.

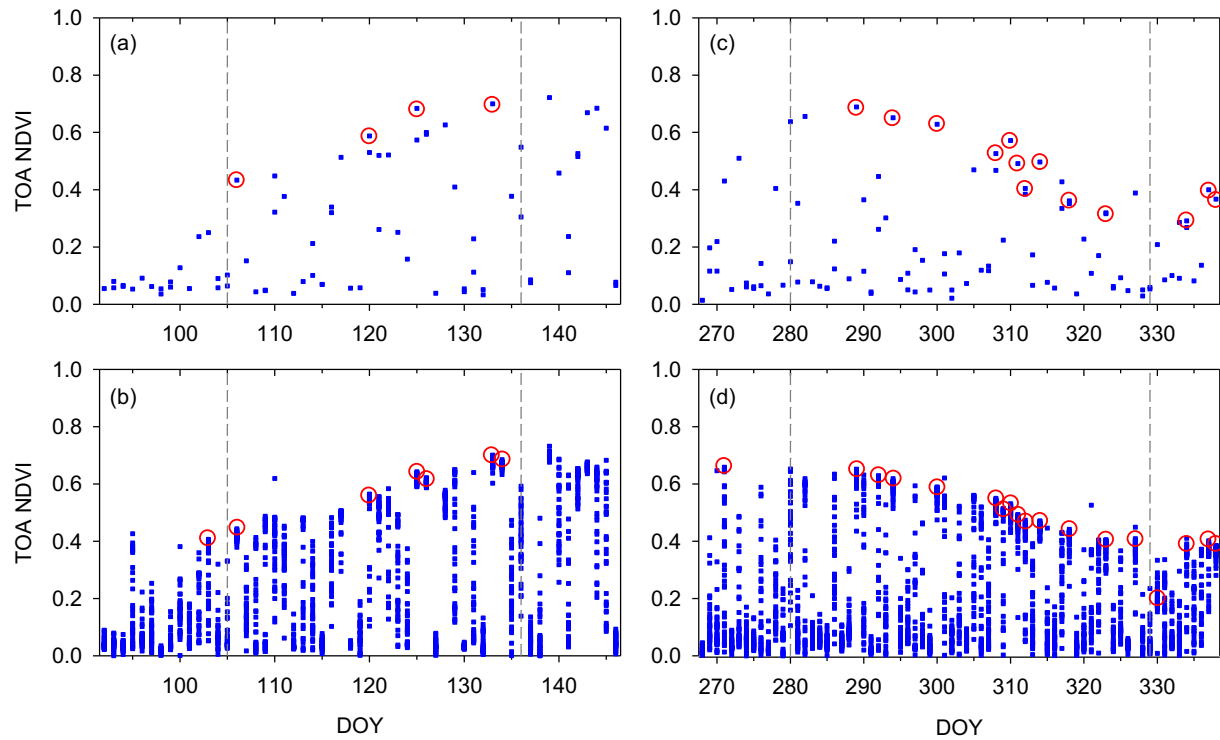

Supplementary Figure S6. Same as Supplementary Fig. S4, but for the FHK site for the year 2017.

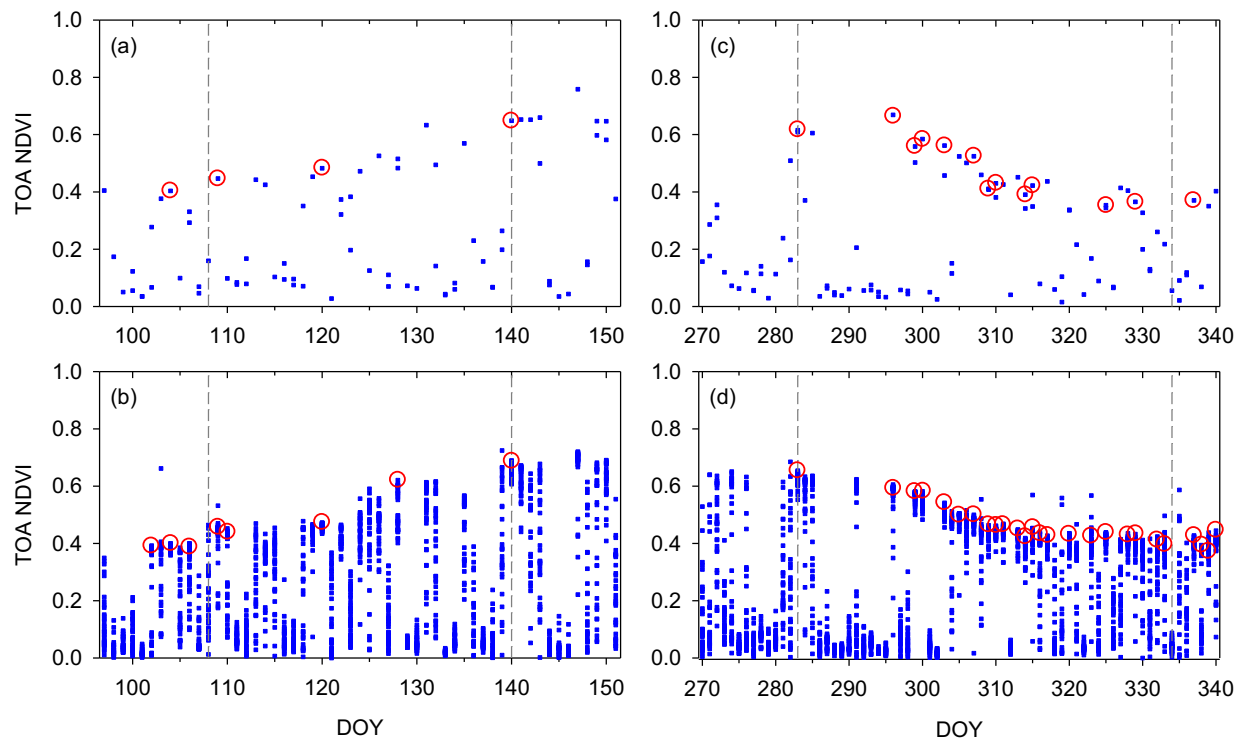

Supplementary Figure S7. Same as Supplementary Fig. S4, but for the Terrestrial Environment Research Center of University of Tsukuba (TGF) site for the year 2016. The green-up and brown-down periods for the TGF site were determined to enclose the periods of the increasing and decreasing NDVI, respectively, as observed in the AHI and VIIRS temporal profiles extracted over the site (see Fig. 1e, f).

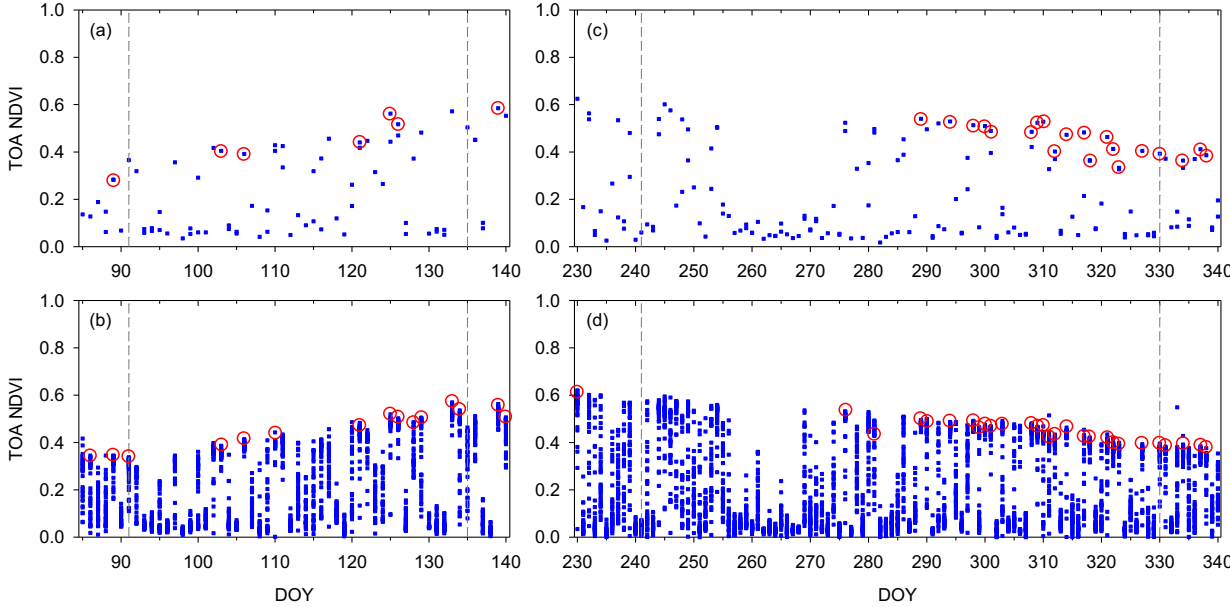

Supplementary Figure S8. Same as Supplementary Fig. S4, but for the TGF site for the year 2017.

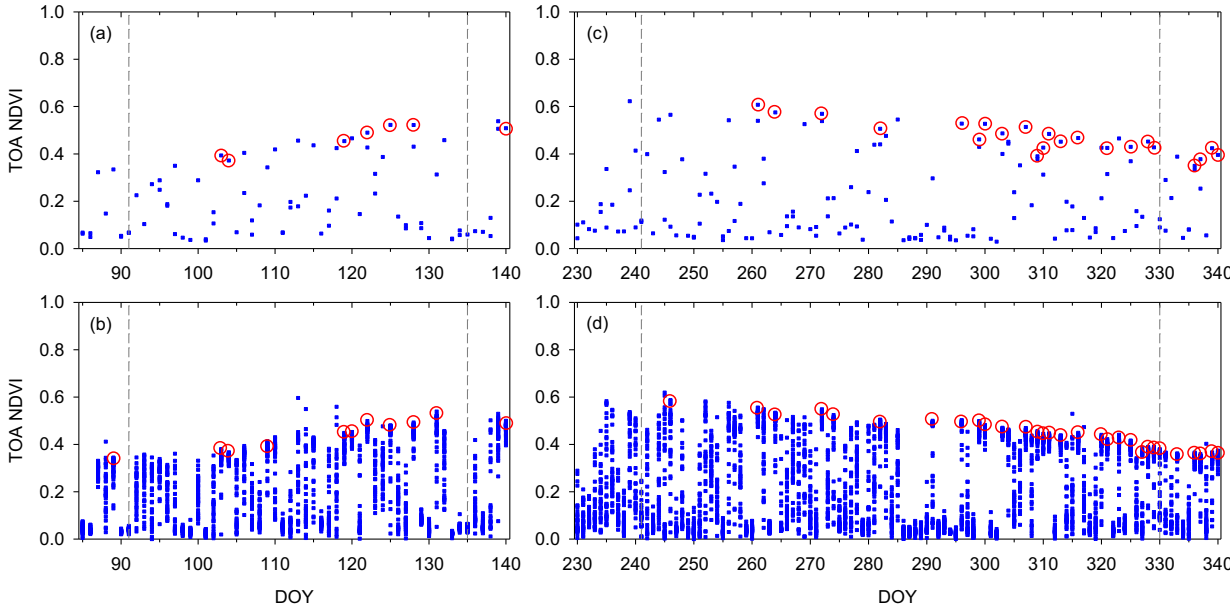

Supplementary Figure S9. AHI NDVI diurnal time series plots of select pairs of days for the Takayama (TKY) site. Each plot contains two time series: one without any confirmed “cloud-free” observations (red circles) and the other with confirmed cloud-free observations (blue diamonds) by PEN sky images. The blue open diamonds represent confirmed “cloud-free” observations and, thus, cloud-free NDVI values. The brackets indicate the time periods where visual inspection of AHI false color composite images indicated cloud-free AHI observations over the TKY site. For each plot, one sample AHI false color image during the time period (the time of the image indicated by the arrow on the plot) is shown at the right of the plot.

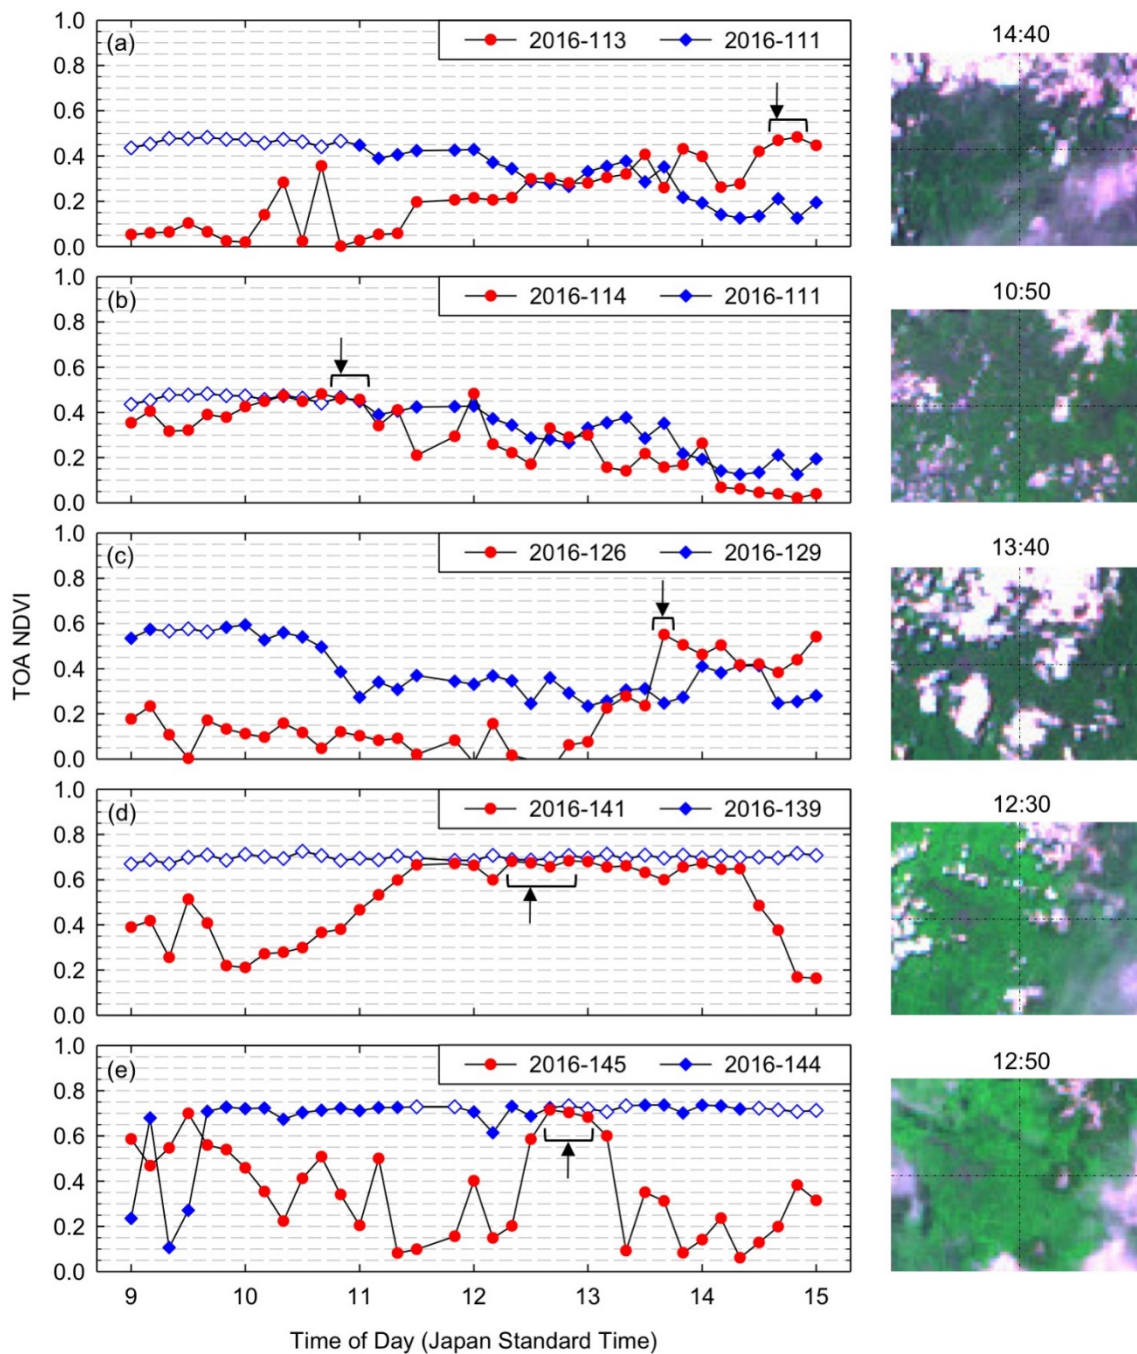

(Supplementary Figure S9 – continued)

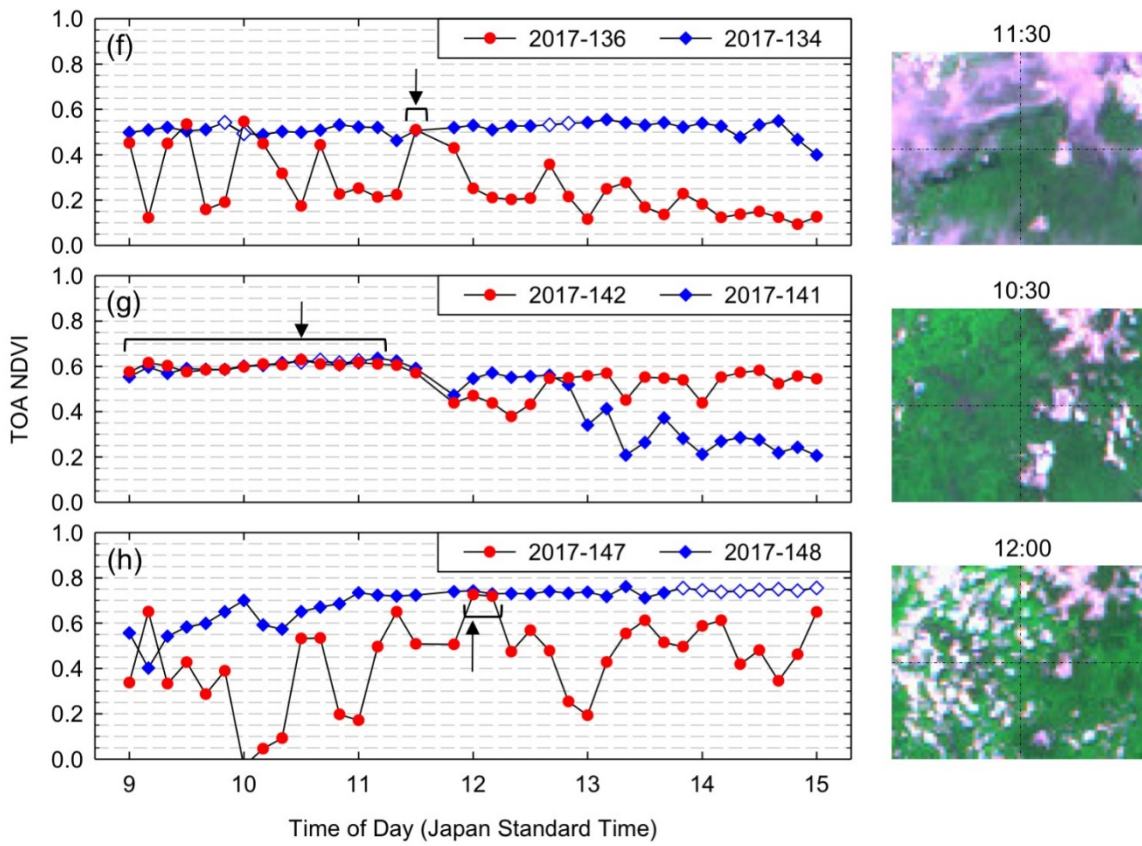

Supplement: 41598_2019_52076_MOESM1_ESM.pdf [file 41598_2019_52076_MOESM1_ESM.pdf]
